# Supplementary material
Source: MDPI journal article supplement (https://www.mdpi.com/2072-4292/9/11/1117)
Supplement: s1 [file s1]

## Supporting Information

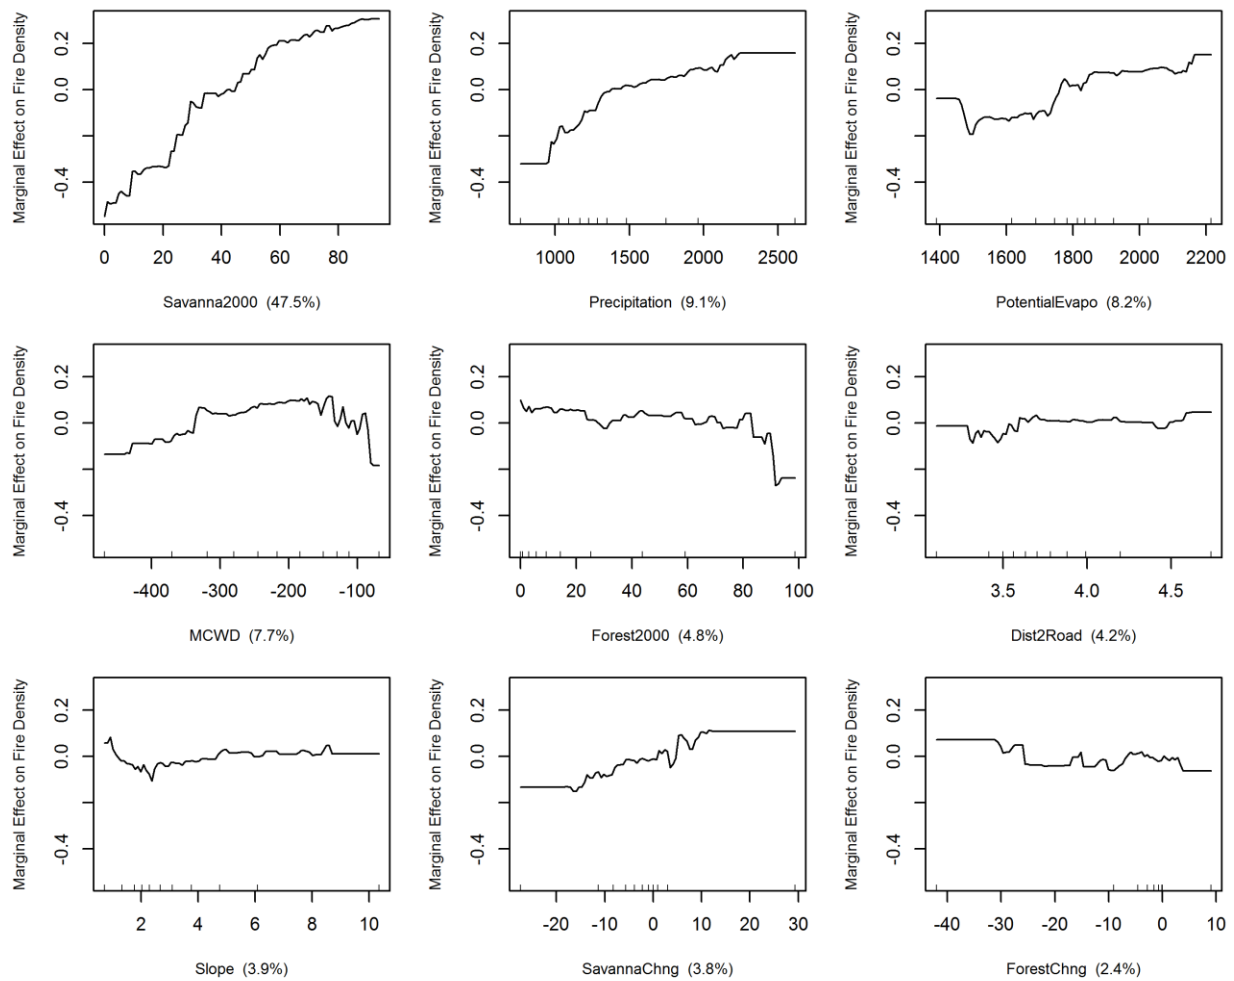

**Figure S 1:** Partial dependence plots of the nine most important variables influencing the spatial pattern of active fire density.

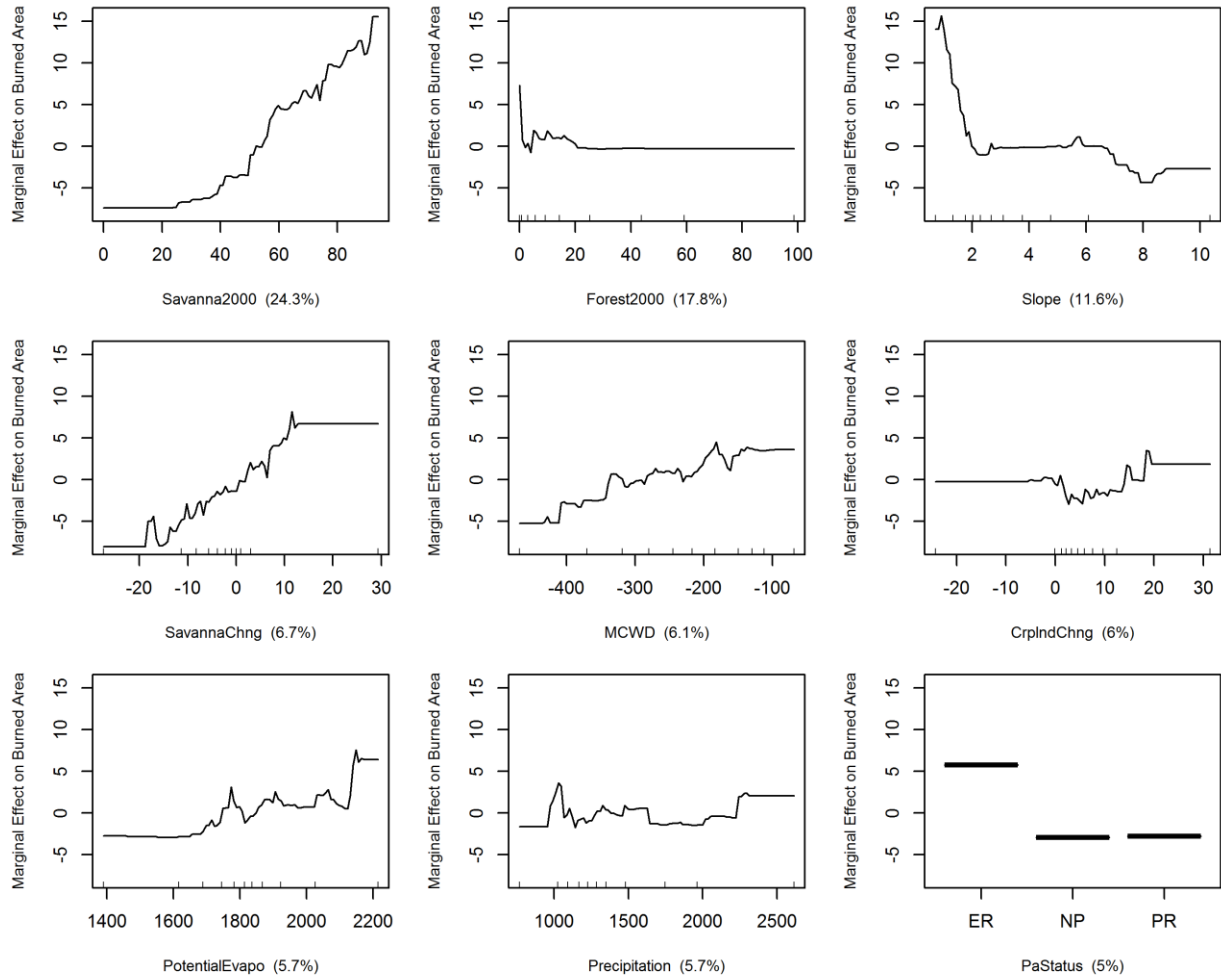

**Figure S 2:** Partial dependence plots of the nine most important variables influencing the spatial pattern of burned area.

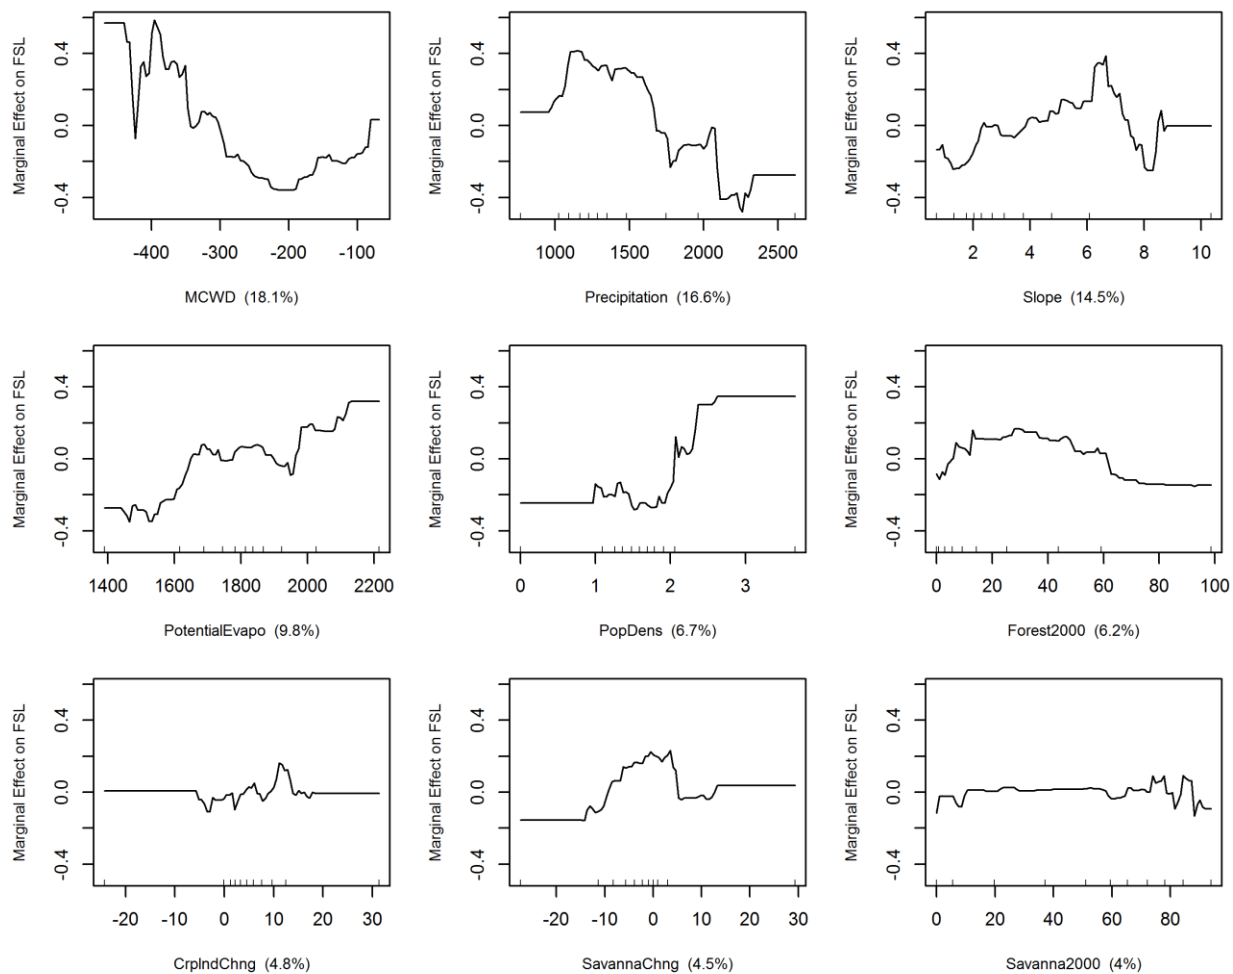

**Figure S 3:** Partial dependence plots of the nine most important variables influencing the spatial pattern of fire season length.

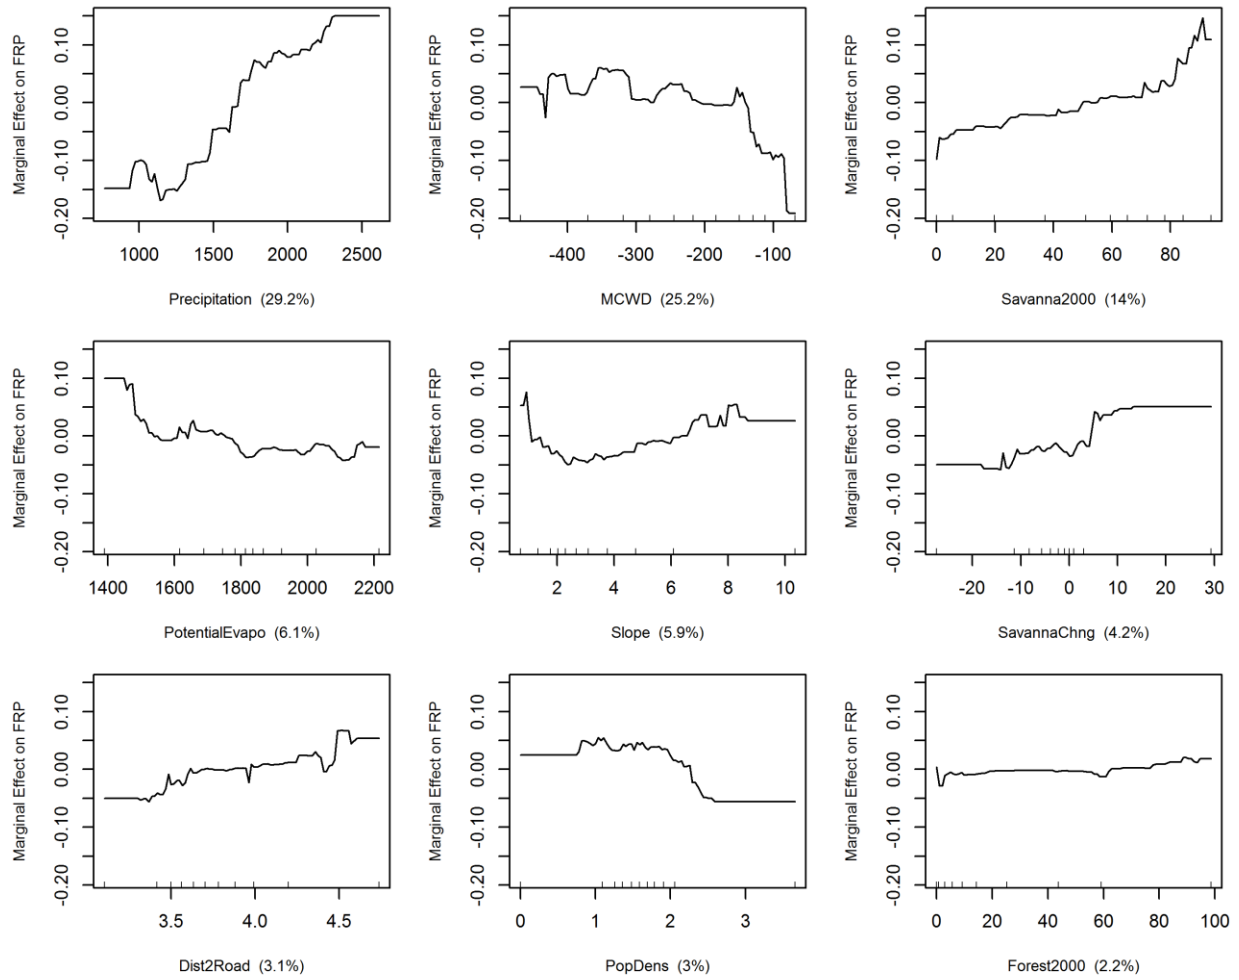

**Figure S 4:** Partial dependence plots of the nine most important variables influencing the spatial pattern of fire radiative power.

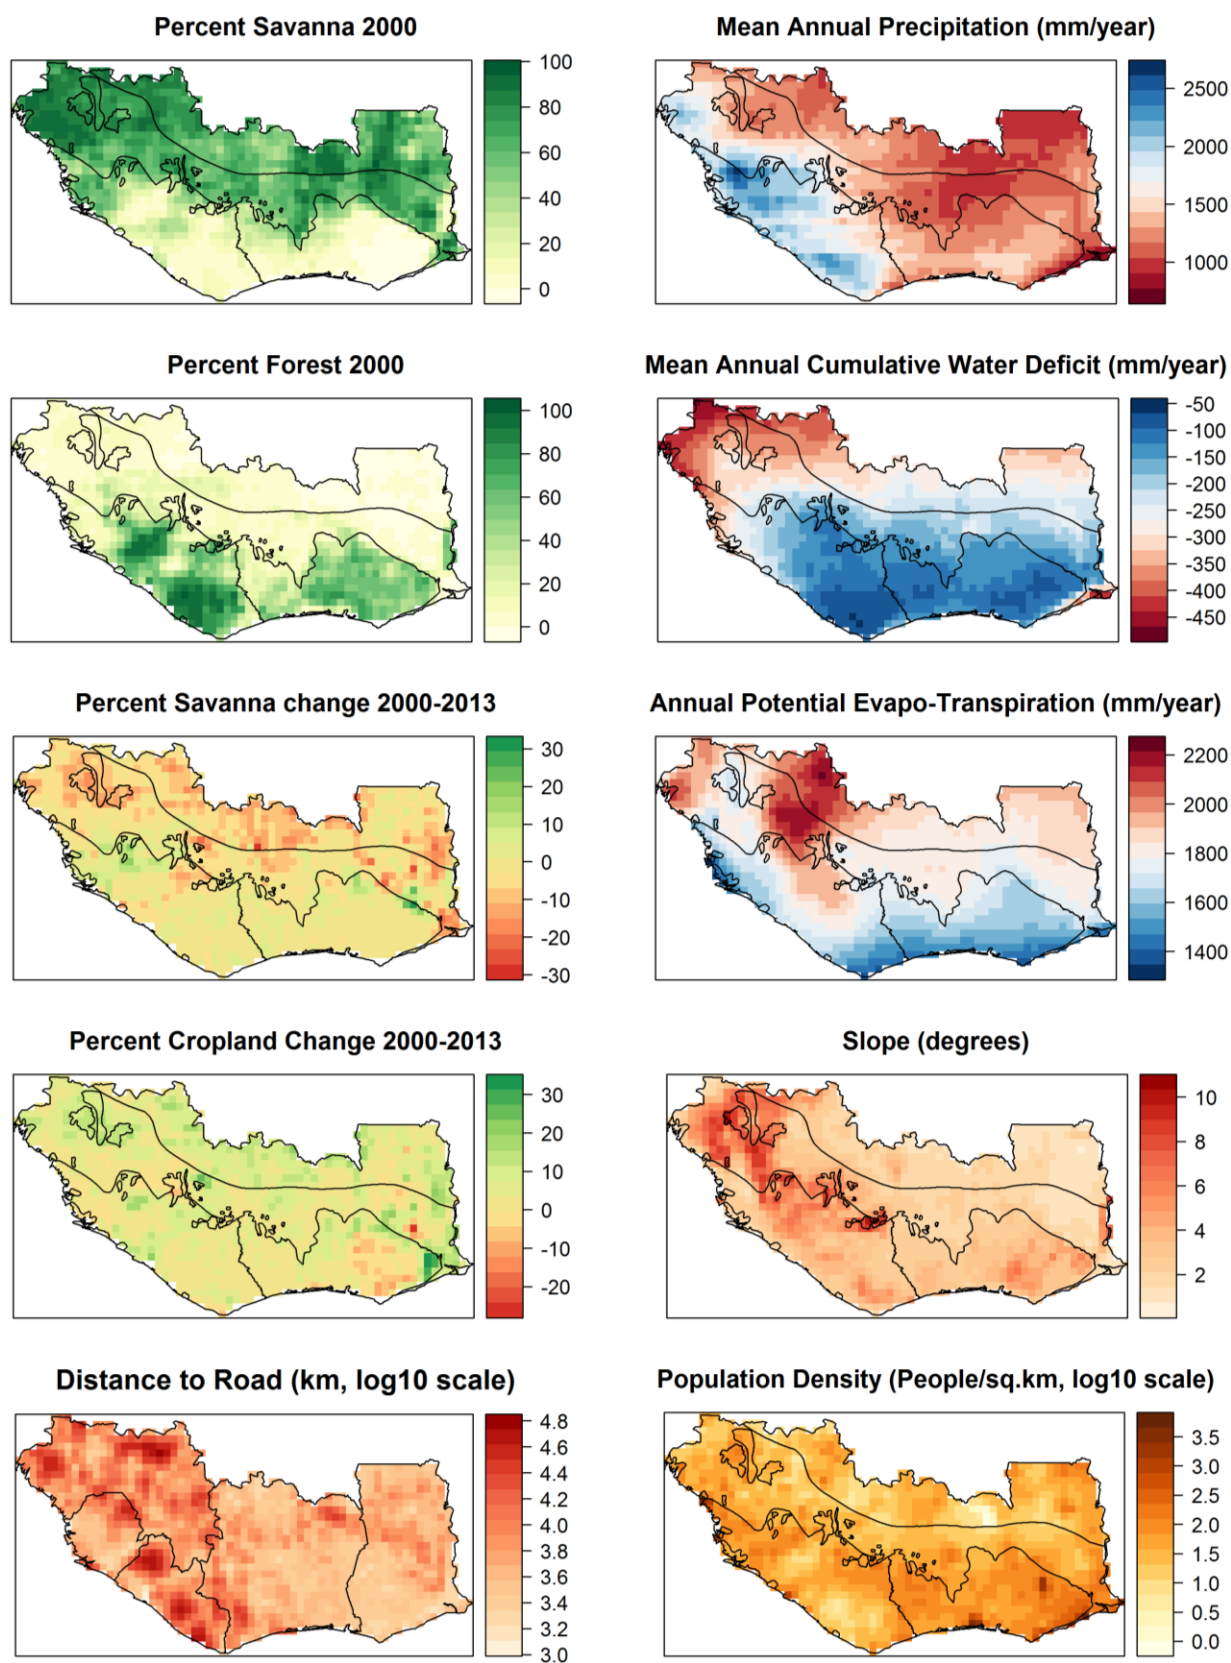

**Figure S 5:** Maps of the 10 most important independent variables in the BRT models.
